# Supplementary material for: Large herbivore functional guilds and soil carbon storage in a semi-arid southern African landscape
Source: Research Square preprint supplement (doi:10.21203/rs.3.rs-5375091/v1), 2025-03-20

**Supplemental Figures and Tables for**

***Large herbivore functional guilds and soil carbon storage in a semi-arid southern African landscape***

Urmila B. Mallick, Kaggie Orrick, Gaseitsiwe Masunga, Oswald J. Schmitz

**
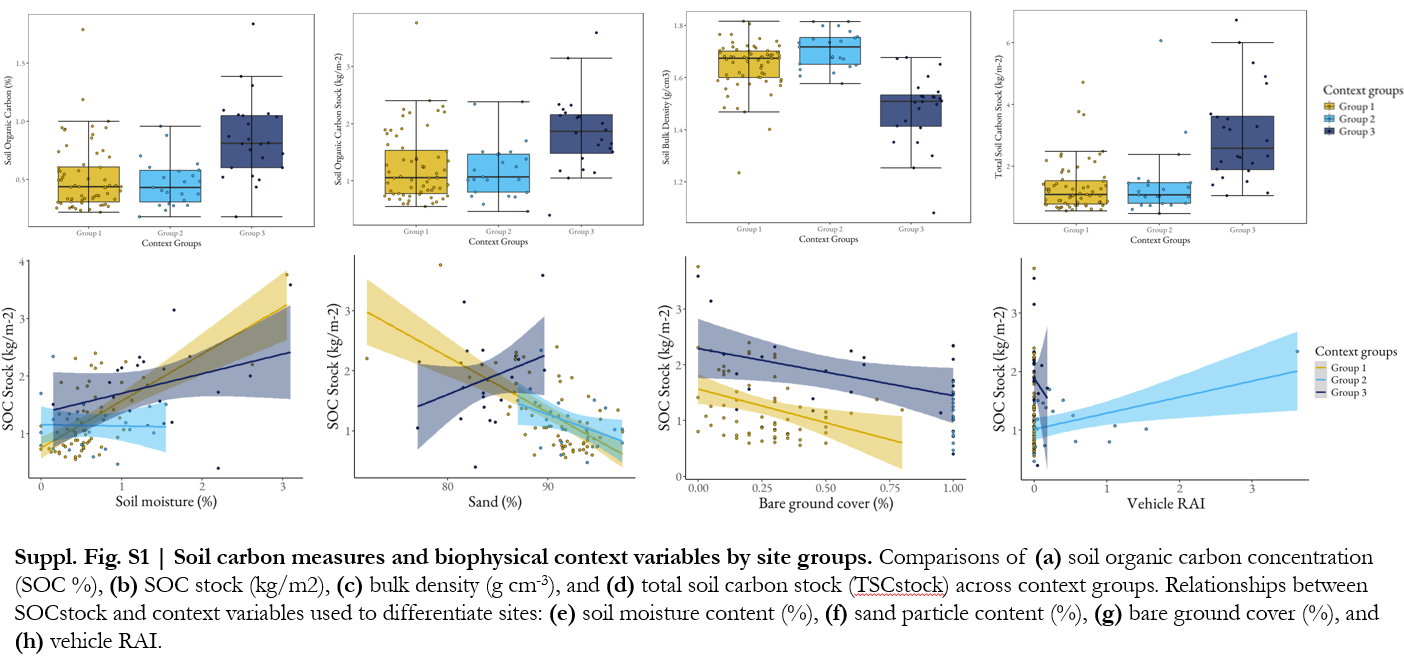
**

**Fig. S1 | Soil carbon measures and biophysical context variables by site groups.** Comparisons of **(a)** soil organic carbon concentration (SOC %), **(b)** SOCstock (kg/m2), **(c)** bulk density (g cm-3), and **(d)** total soil carbon stock (TSCstock) across context groups. Relationships between SOCstock and context variables used to differentiate sites: **(e)** soil moisture content (%), **(f)** sand particle content (%), **(g)** bare ground cover (%), and **(h)** vehicle RAI.


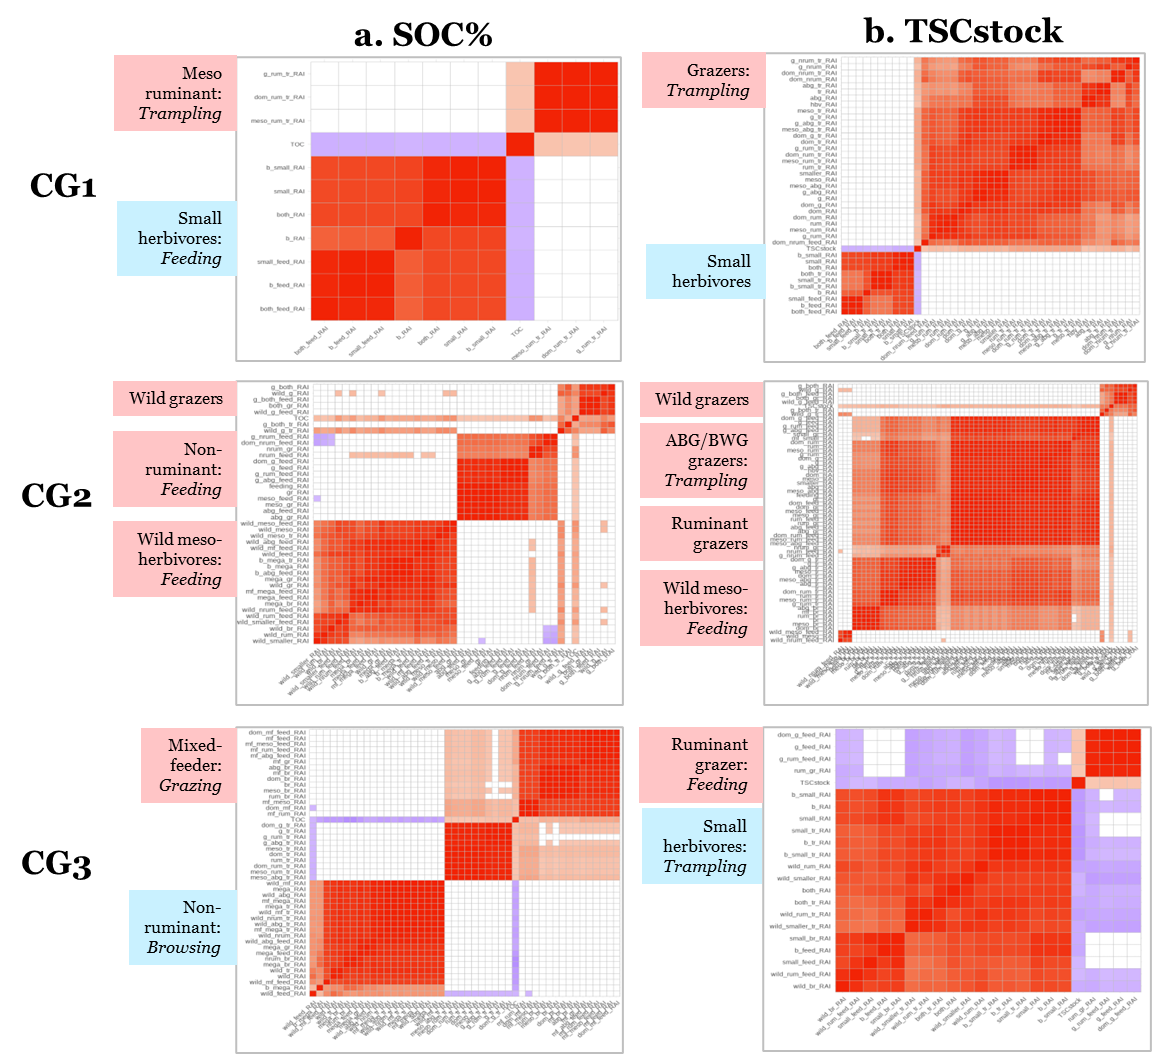


**Fig. S2 |** LH functional trait groups most strongly correlated with **(a)** SOC% and **(b)** TSCstock by context group.

**Table S1.** Raw sighting counts and daily Relative Activity Indices (RAI) for vehicles and LH species classifications across CT8-North, CT8-South, and MPNP sites.


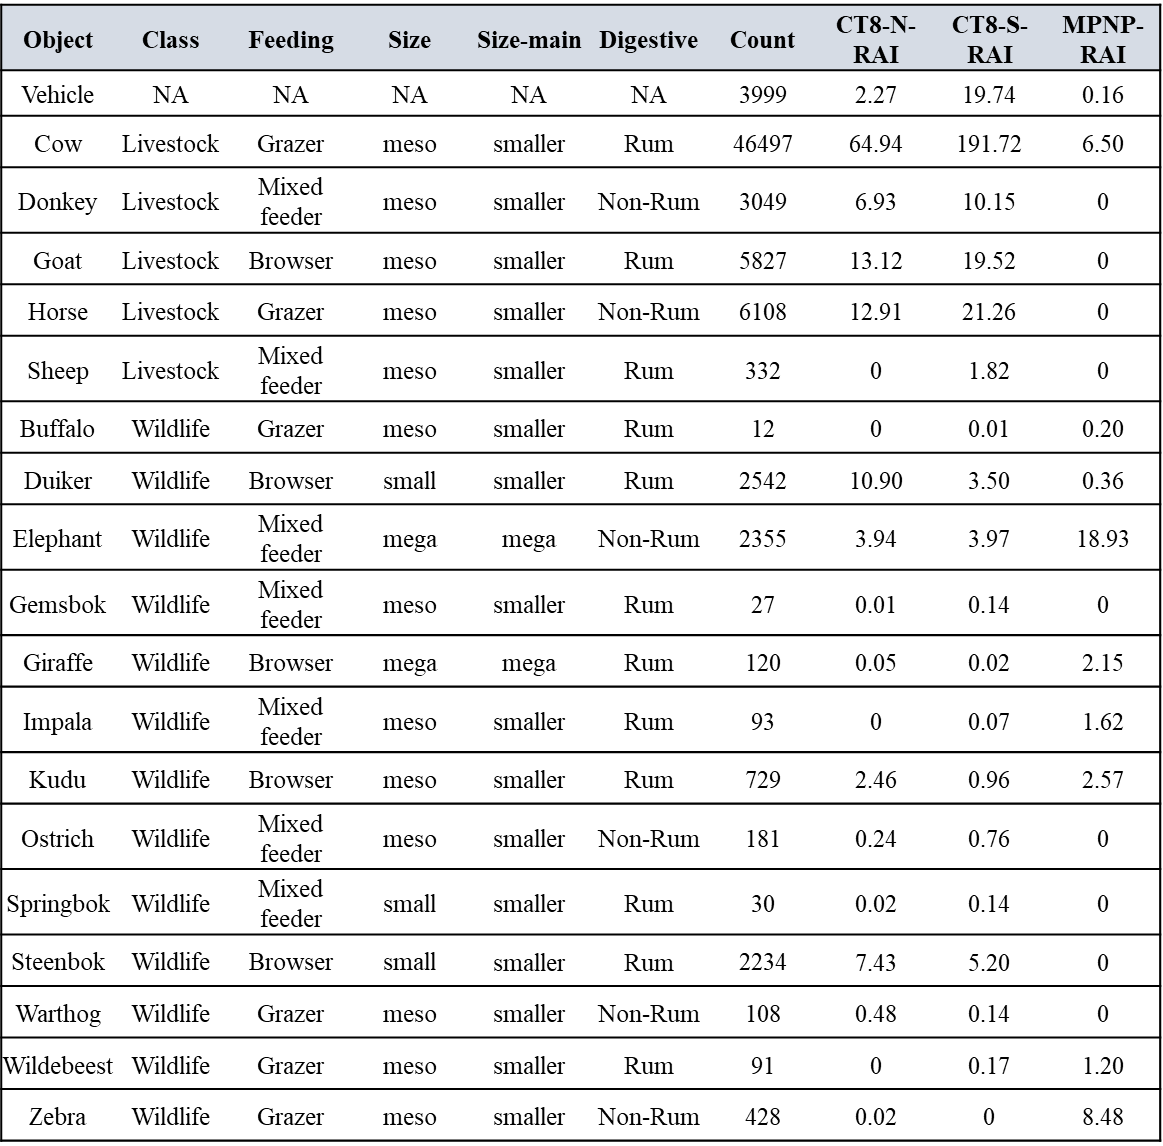


**Table S2.** Results of generalized linear model performed to evaluate bulk density for selected sites.


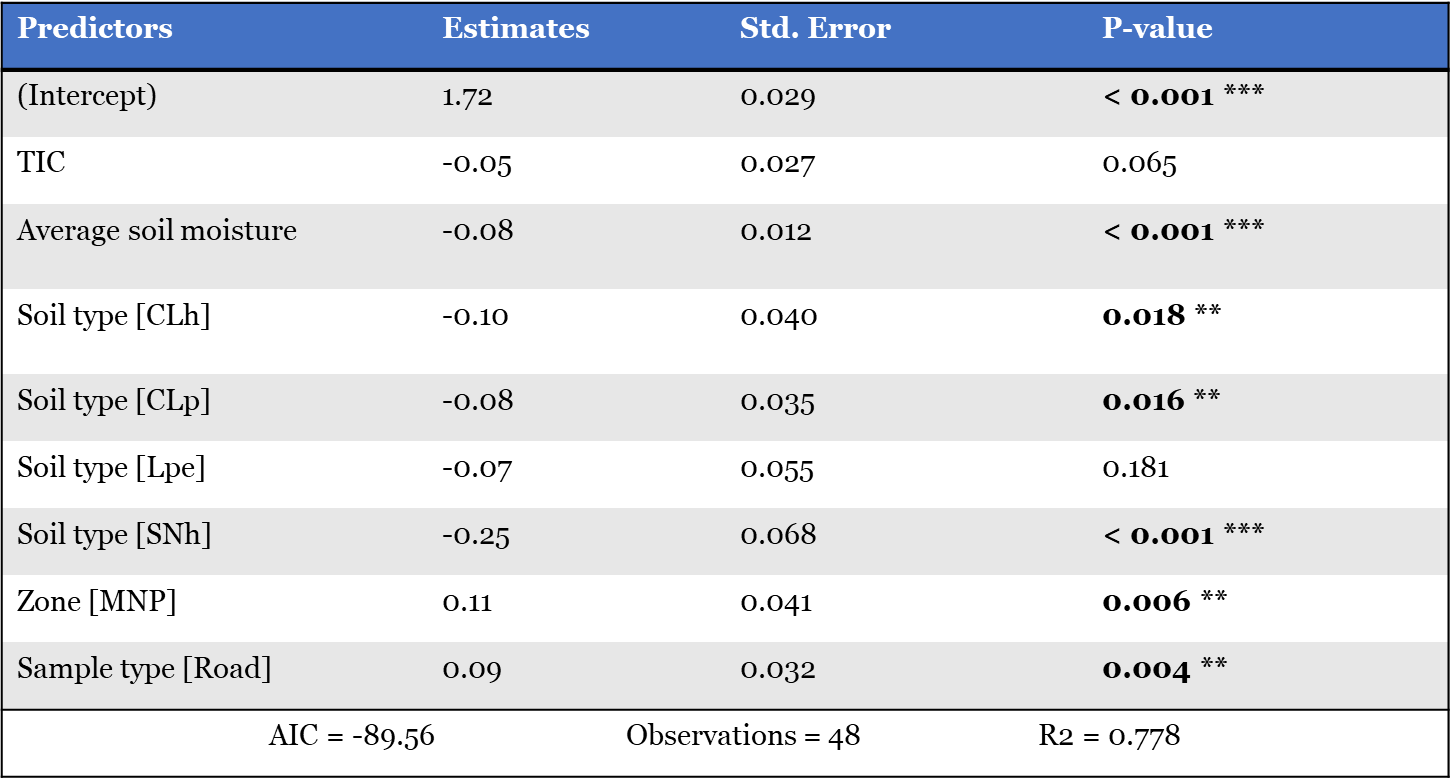


**Table S3.** Results of linear modelsexplaining soil organic carbon concentration (SOC%) and total soil carbon stock (TSCstock) for the three context groups.


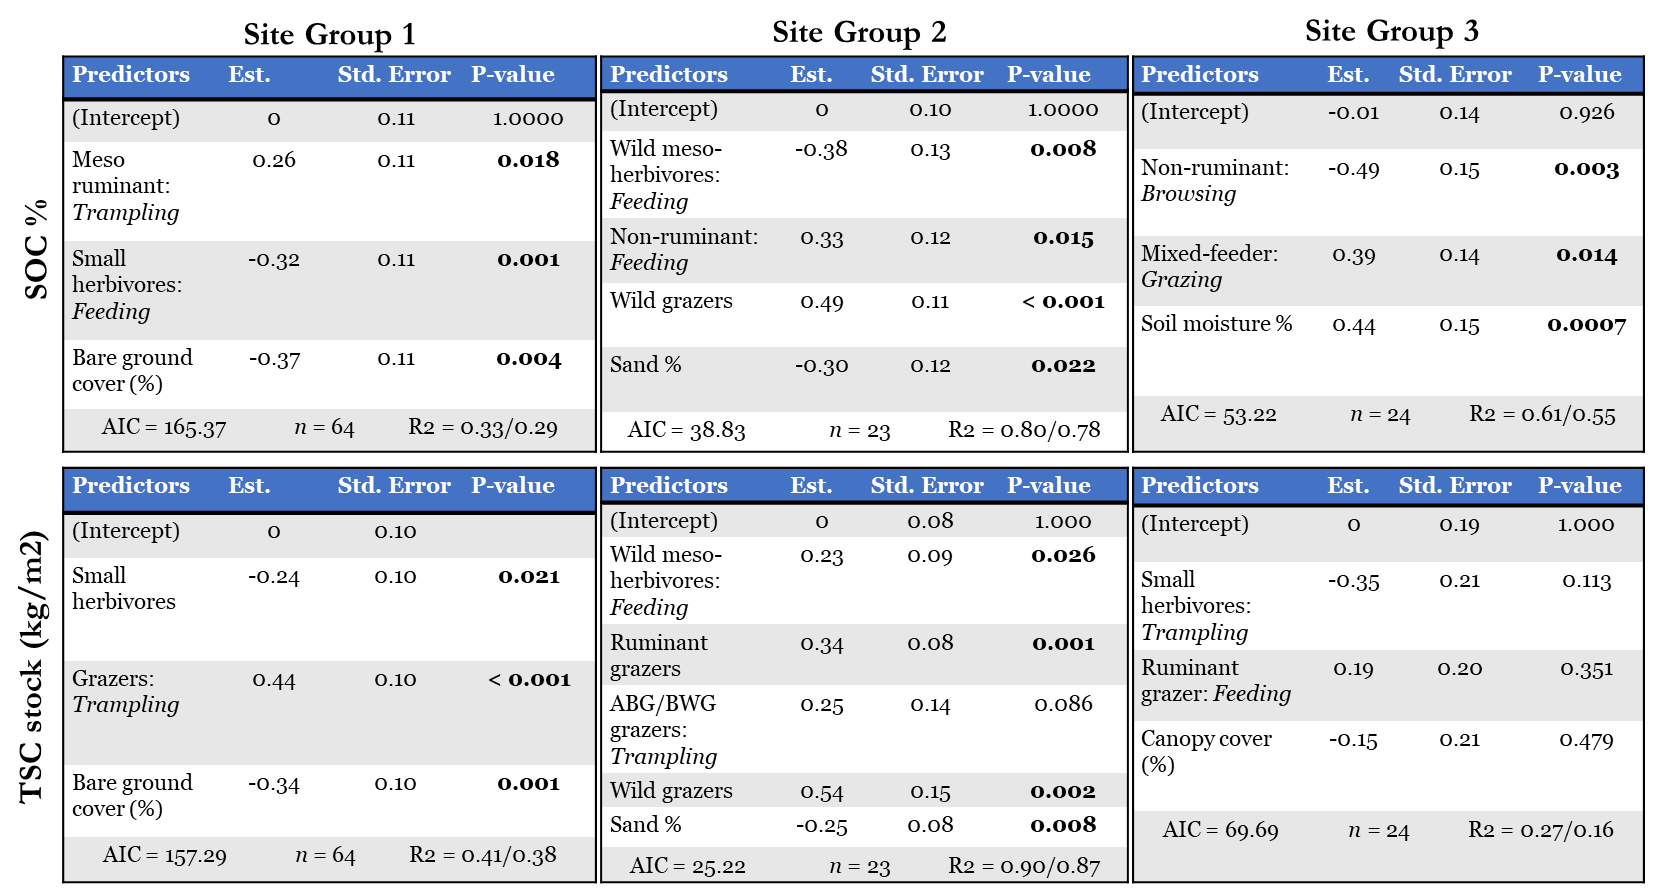

Supplement: Supplementary file 1 [file cb7ed7bdb661347d95db8e4e.docx]
